# Supplementary material for: Light Intensity-Mediated Induction of Trichome-Associated Allelochemicals Increases Resistance Against Thrips in Tomato
Source: PubMed Central journal article supplement — Plant Cell Physiol. 2018 Aug 14;59(12):2462–75. doi: 10.1093/pcp/pcy166 (PMC6290487; doi:10.1093/pcp/pcy166), 2018-08-14
Supplement: pcy166_suppl_data.pdf [file pcy166_suppl_data.pdf]

## **Supplementary Data**

### **Light Intensity-Mediated Induction Of Trichome-Associated Allelochemicals Increases Resistance Against Thrips In Tomato**

Rocío Escobar-Bravo<sup>1</sup>, Jasmijn Ruijgrok<sup>1</sup>, Hye Kyong Kim<sup>1</sup>, Katharina Grosser<sup>2,3</sup>, Nicole M. Van Dam<sup>2,3</sup>, Peter G.L. Klinkhamer<sup>1</sup>, Kirsten A. Leiss<sup>1\*</sup>

<sup>1</sup>Plant Science and Natural Products, Institute of Biology Leiden (IBL), Leiden University. Sylviusweg 72, 2333BE Leiden (The Netherlands).

<sup>2</sup>Molecular Interaction Ecology, German Center for Integrative Biodiversity Research (iDiv), Halle-Gena-Leipzig, Deutscher Platz 5e, 04103 Leipzig (Germany).

<sup>3</sup>Friedrich Schiller University Jena, Institute of Biodiversity, Dornburger-Str. 159, 07743 Jena (Germany).

\*Current address: Wageningen University & Research, Business Unit Horticulture, Violierenweg 1, 2665MV Bleiswijk (The Netherlands).

To whom correspondence should be addressed:

Rocio Escobar-Bravo, E-mail: [r.bravo@biology.leidenuniv.nl](mailto:r.bravo@biology.leidenuniv.nl)

This file contains information on supplementary Figures S1-S3, Table S1-S2 with legends, Method S1, and Notes S1.

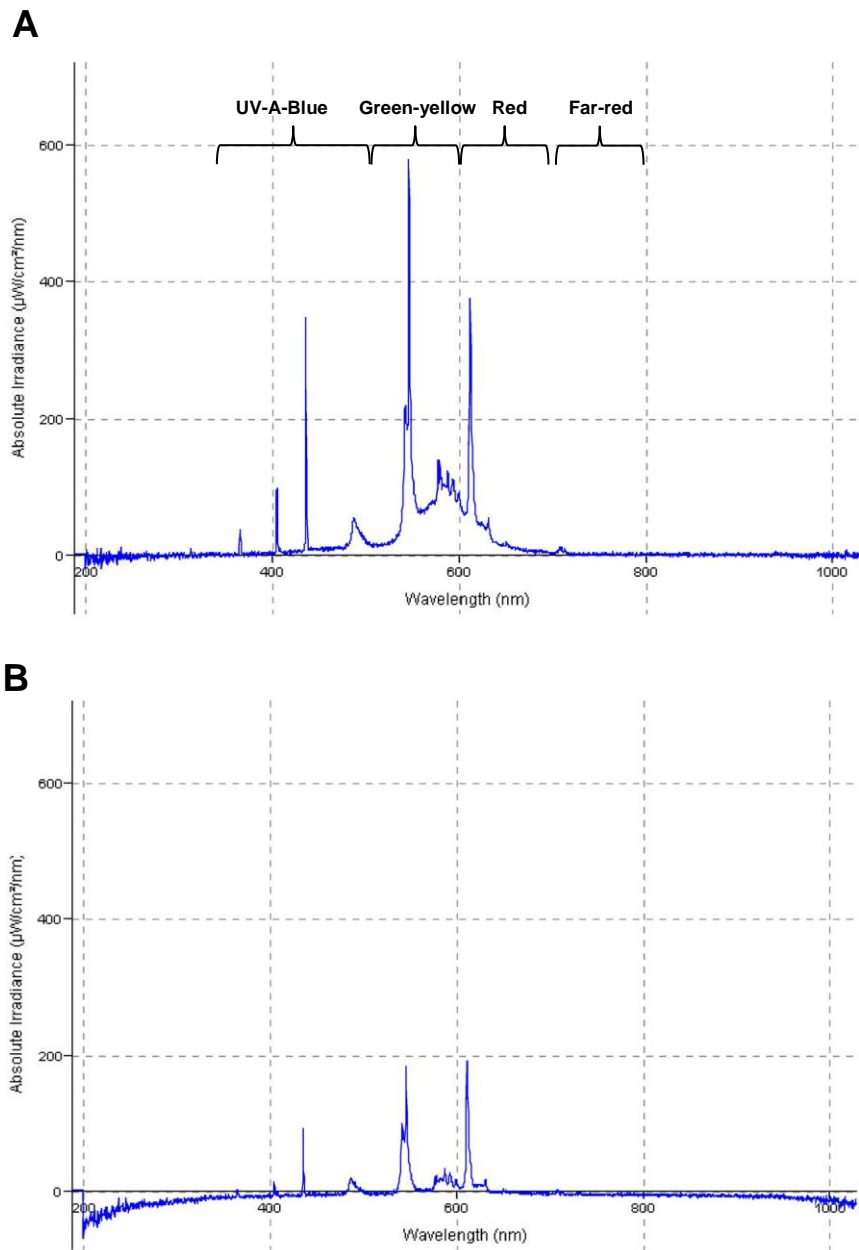

**Fig. S1.** Spectral quality in high (a) and low (b) PAR conditions were measured using a spectrometer UV-Vis equipped with a cosine corrector (Flame-S, Ocean Optics).

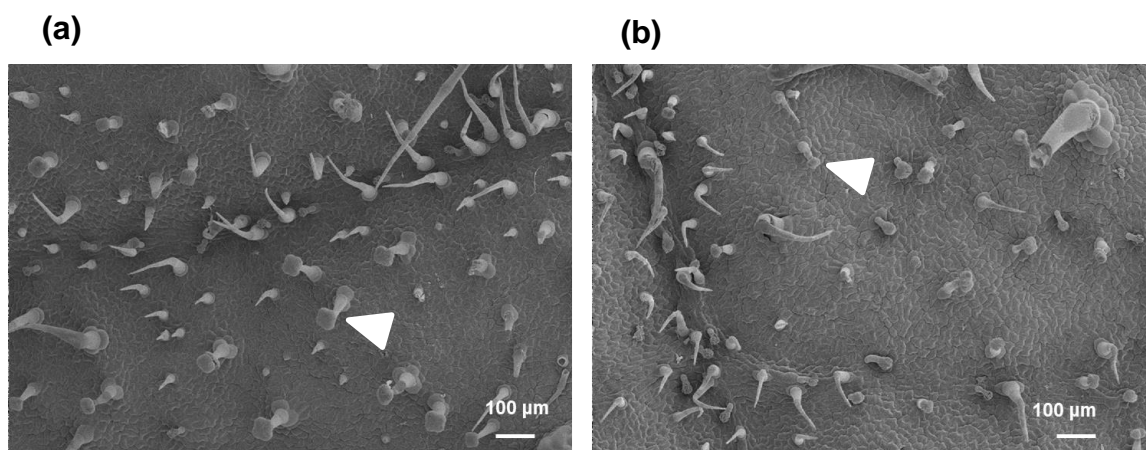

**Fig. S2.** Scanning electron micrographs of adaxial leaf surfaces of wild-type (a) and *od-2* (b) plants grown under high PAR conditions. Note that type-VI glandular trichomes (pointed by white triangles) in *od-2* leaves display smaller sizes and different shapes when compared to the wild-type.

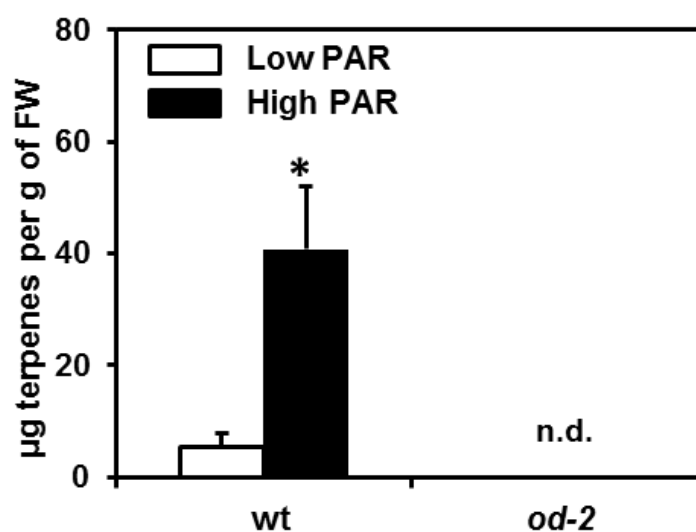

**Figure S3.** Effect of low and high photosynthetically active radiation (PAR) treatments on type-VI leaf trichome-associated defenses in wild-type (wt) and *odorless-2* (*od-2*) plants. Total terpene content (mean + SEM,  $n = 4$ ) in leaf exudates of leaflets taken from the third/fourth youngest leaf were measured at 35 days after the initial light treatment. Asterisks denote significant differences between low and high PAR-treated wild-type plants analyzed by *t-test*. n.d. = not detected.

**Table S1.** Nucleotide sequence of primers used for qRT-PCR analysis.

| <b>Target gene</b> | <b>Gene identification</b> | <b>Forward Primer<br/>5' → 3'</b> | <b>Reverse Primer<br/>5' → 3'</b> |
|--------------------|----------------------------|-----------------------------------|-----------------------------------|
| <i>WIPI-II</i>     | Solyc01g095200             | GACAAGGTACTAGTAATCAATTATCC        | GGGCATATCCCGAACCAAGA              |
| <i>TD-2</i>        | Solyc09g008670             | TGCCGTAAAAATGTCACCA               | ACTGGCGATGCCAAAATATC              |
| <i>JIP-21</i>      | Solyc03g098790             | ACTCGTCCTGTGCTTTGTCC              | CCCAAGAGGATTTTCGTTGA              |
| <i>Actin</i>       | Solyc03g078400             | TTAGCACCTTCCAGCAGATGT             | AACAGACAGGACACTCGCACT             |

**Table S2.** Transitions or specific pair of m/z values associated to the precursors and fragment ions of the analytes measured by LC/MS.

| <b>Analyte</b>      | <b>Q1 [m/z] → Q3 [m/z]<sup>a</sup></b> | <b>CE [V]</b> | <b>Standard</b> |
|---------------------|----------------------------------------|---------------|-----------------|
| ABA                 | (-)263.13 → 153.00                     | 9             | D6-ABA          |
| JA                  | (-)209.12 → 59.00                      | 12            | D6-JA           |
| JA-Ile              | (-)322.20 → 130.00                     | 19            | D6-JA-Ile       |
| SA                  | (-) 137.02 → 93.00                     | 15            | D6-SA           |
| IAA                 | (+) 176.07 → 130.00                    | -14           | D5-IAA          |
| D6-ABA              | (-) 269.17 → 159.00                    | 10            |                 |
| D6-JA               | (-)215.15 → 59.00                      | 10            |                 |
| D6-JA-Ile           | (-) 328.24 → 130.00                    | 19            |                 |
| D6-SA               | (-)141.05 → 97.00                      | 15            |                 |
| D5-IAA <sup>b</sup> | (+) 181.10 → 135.00                    | -14           |                 |
|                     | (+) 181.10 → 134.00                    | -14           |                 |
|                     | (+) 181.10 → 133.00                    | -14           |                 |
| OPDA                | (-) 291,00 → 165.00                    | 18            | D6-JA-Ile       |

CE: collision energy

a Resolution: Q1: 0.7, Q3: 22

b Analyzed as the sum of all three transitions

## Methods S1. Hormone extraction and analysis

Hormones extraction was performed in approximately 100 mg of frozen and homogenized leaf material aliquoted in 2 ml Eppendorf tubes. After adding 1 ml of ethyl acetate containing 40 ng of phytohormone standards D<sub>6</sub>-ABA (Olchemin), D<sub>6</sub>-JA (HPC), D<sub>6</sub>-JA-Ile (HPC), D<sub>6</sub>-SA (Olchemin) and D<sub>5</sub>-IAA (Olchemin), samples were vortexed for 10 min and centrifuged at 14.000 rpm for 10 min at 4°C. Supernatants were transferred to a new Eppendorf tube and evaporated to dryness on a vacuum concentrator at room temperature. The residue was dissolved in 0.2 ml of 70% methanol (v/v) for 5 min using an ultrasonic bath, and centrifugated at 14.000 rpm for 5 min at room temperature. Supernatants were transferred to glass vials and then analyzed by means of LC-MS/MS

Measurements were conducted on a liquid chromatography-triple quadrupole mass spectrometry system (LC-MS/MS, EVOQ, Bruker). We injected 20 µL of each sample onto C18 Zorbax column (4.6 x 50 mm, 1,8 µm, 600 bar). The mobile phase comprised of solvent A (0.05 % (v/v) formic acid in LCMS-grade water) and solvent B (0.05% (v/v) formic acid in LCMS-grade methanol). The program with a constant flow rate of 0.4 ml/min was set as follows: 0 - 0.5 min 95% solvent A; 0.5 - 2.5 min 50% solvent A and 50% solvent B; 2.5 - 3.5 100% solvent B; 3.5 - 4.5 min 95% solvent A. The column temperature was set at 42°C. The cone, probe and nebulizer gas were set at the following flow conditions (arbitrary units/temperature): 35/350°C, 60/475°C and 60, respectively. Phytohormones were measured by monitoring the transition m/z described in Supporting Information Table S2. Phytohormones were quantified using the signal of their corresponding internal standard, and expressed as ng per gram fresh mass leaf material.

**Note S1.** For the second analysis of terpene content in leaf exudates of low and high-PAR treated plants we used benzyl acetate as an internal standard following the same procedure described in Materials and Methods.
